# Supplementary material for: Ultrasound-mediated delivery of RGD-conjugated nanobubbles loaded with fingolimod and superparamagnetic iron oxide nanoparticles: targeting hepatocellular carcinoma and enhancing magnetic resonance imaging
Source: Royal Society of Chemistry journal article supplement (doi:10.1039/d0ra06415g), 2020-01-01
Supplement: d0ra06415g1.pdf [file d0ra06415g1.pdf]

## Supplemental Information (SI)

XRD spectrum confirmed that the prepared SPIONs were  $\text{Fe}_3\text{O}_4$ , as the characteristic peaks at  $30.2^\circ$ ,  $35.6^\circ$ ,  $43.0^\circ$ ,  $53.4^\circ$ ,  $57.1^\circ$ , and  $62.5^\circ$ , matched to those of the standard  $\text{Fe}_3\text{O}_4$  powder diffraction data (PDF #79-0419).

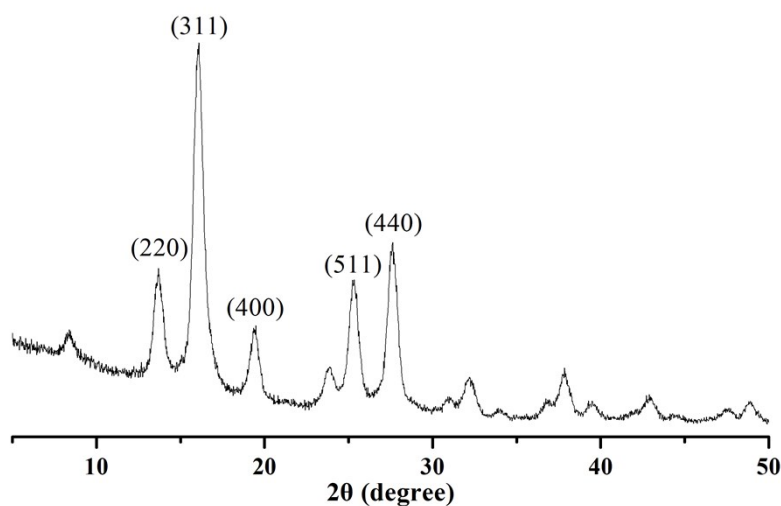

**Figure S1. X-ray diffraction pattern of the prepared SPIONs**

TEM image showed that the prepared SPIONs were spherical and monodisperse, with an average particle size of 8 nm and a PDI of  $0.202 \pm 0.012$ .

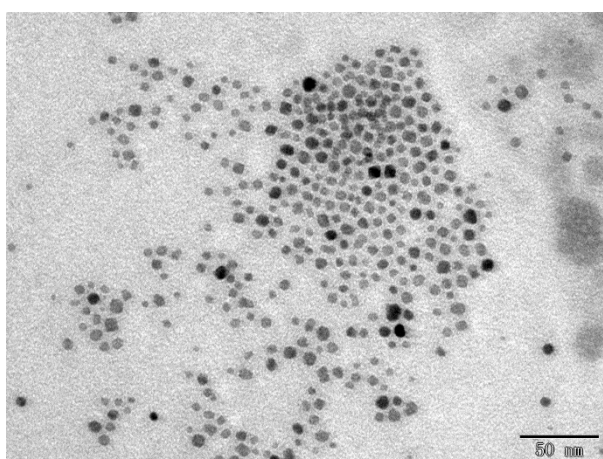

**Figure S2. TEM images of the prepared SPIONs**
